# Supplementary material for: Ambient temperature and spontaneous intracerebral haemorrhage: a cross-sectional analysis in Tainan, Taiwan
Source: PubMed Central journal article supplement — BMJ Open. 2012 Jun 8;2(3):e000842. doi: 10.1136/bmjopen-2012-000842 (PMC3371577; doi:10.1136/bmjopen-2012-000842), 2012-06-08
Supplement: bmjopen-2012-000842.draft_revisions.pdf [file bmjopen-2012-000842.draft_revisions.pdf]

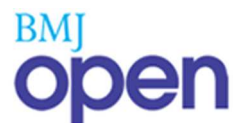

## Helmet use in BIXI cyclists in Toronto, Canada: An observational study

|                                    |                                                                                                                                                                                                                                                                                                                                                           |
|------------------------------------|-----------------------------------------------------------------------------------------------------------------------------------------------------------------------------------------------------------------------------------------------------------------------------------------------------------------------------------------------------------|
| Journal:                           | <i>BMJ Open</i>                                                                                                                                                                                                                                                                                                                                           |
| Manuscript ID:                     | bmjopen-2012-001049                                                                                                                                                                                                                                                                                                                                       |
| Article Type:                      | Research                                                                                                                                                                                                                                                                                                                                                  |
| Date Submitted by the Author:      | 21-Feb-2012                                                                                                                                                                                                                                                                                                                                               |
| Complete List of Authors:          | Bonyun, Marissa; University of Toronto, Faculty of Medicine<br>Camden, Andi; The Hospital for Sick Children, Child Health Evaluative<br>Sciences;<br>Macarthur, Colin; The Hospital for Sick Children, Child Health Evaluative<br>Sciences; University of Toronto, Department of Paediatrics<br>Howard, Andrew; Hospital for Sick ChilDr.en, Orthopaedics |
| <b>Primary Subject<br>Heading</b>: | Public health                                                                                                                                                                                                                                                                                                                                             |
| Secondary Subject Heading:         | Epidemiology                                                                                                                                                                                                                                                                                                                                              |
| Keywords:                          | PUBLIC HEALTH, Traffic/Prevention & Control, Injury Prevention, Head<br>Protective Devices                                                                                                                                                                                                                                                                |
|                                    |                                                                                                                                                                                                                                                                                                                                                           |

SCHOLARONE™  
Manuscripts

## Helmet use in BIXI cyclists in Toronto, Canada: An observational study

Marissa Bonyun, BHSc<sup>c</sup>, Andi Camden, MPH<sup>a</sup>, Colin Macarthur, MBChB, PhD<sup>a,g</sup>,

Andrew Howard, MD, MSc FRCSC<sup>a,b,e,f</sup>

Child Health Evaluative Sciences<sup>a</sup>; Orthopaedic Surgery<sup>b</sup>, The Hospital for Sick Children,

Toronto, Canada

Faculty of Medicine<sup>c</sup>; Department of Surgery<sup>e</sup>; Health Policy, Management and Evaluation<sup>f</sup>,

Department of Paediatrics<sup>g</sup>, University of Toronto, Toronto, Canada

Word Count – Manuscript: 2295, Abstract: 156

MeSH terms: Head Protective Devices; Bicycling; Accidents, Traffic/Prevention & Control;

Canada

Corresponding Author:

Dr. Andrew Howard, the Hospital for Sick Children

555 University Avenue, Room S-107

Toronto, ON M5G 1X8

Phone: 416 813 6430, Fax: 416 813 6414, Email: andrew.howard@sickkids.ca

## ARTICLE SUMMARY

### Article Focus

1. We investigated the use of helmets for cyclists choosing to use BIXI bikes in comparison to personal bike riders in the City of Toronto.
2. We hypothesized that the proportion of helmet users using BIXI bikes would be significantly lower than those on personal bikes.

### Key Messages

1. Cyclists using BIXI bikes in Toronto are less likely to wear a helmet than cyclists riding their own bike; only 20.9% of all BIXI cyclists wear helmets compared to 51.7% of cyclists riding a personal bike.
2. More males than females are using the BIXI bikesharing program.
3. Females in Toronto were more likely to wear a helmet while cycling.

**Strengths:** This is the first study (to our knowledge) investigating helmet use in a bikesharing system. Additional strengths include the prospective study design, number of observations, randomly selected observation sites and stratified analyses by sex.

**Limitations:** The data was collected by one observer not blinded to the study hypothesis, observations were limited to presumed commuter hours in the downtown core of Toronto and we were unable to account for variables previously associated with helmet use, including income, education and age.

**ABSTRACT**

Objective: To investigate the use of helmets for cyclists choosing to use BIXI bikes in comparison to personal bike riders in the City of Toronto.

Design: Prospective cohort study design

Setting: Cyclists were observed in Toronto, Canada

Participants: Of the 6732 sample size, 306 cyclists on BIXI bikes and 6426 personal bike riders were observed.

Outcome measure: The outcome of interest was helmet use.

Results: Overall, 50.3% of cyclists wore helmets. The proportion of BIXI bike riders using helmets was significantly lower than the proportion of helmet users on personal bikes (20.9% versus 51.7%, respectively,  $p < 0.0001$ ).

Conclusions: Although the BIXI bike program has provided an alternate means for Torontonians to use a bicycle, cyclists using BIXI bikes are much less likely to wear a helmet. Since the prevalence of helmet use in cyclists in general is already low, helmet use should be especially promoted in BIXI bike riders in order to promote a safe and healthy environment for cyclists.

## INTRODUCTION

Urban cycling promotes healthy living and also minimizes environmental pollutants from vehicle emissions. Bikesharing initiatives, therefore, provide communities with a means to an active, healthy lifestyle via a sustainable means of transportation.<sup>1</sup>

Multiple variations of bikesharing programs have evolved across the world in the last 46 years, yet the core design amongst all programs remains the same – a finite number of bikes are placed throughout a community for citizens and visitors to ‘borrow’ at their leisure for shorter commutes within designated community zones.<sup>1</sup> The target population for these programs is within-city commuters who can benefit from the use of a temporary bicycle and avoid the worry of parking and locking a bike while at their destination.

The most prominent bikesharing program in North America is BIXI (named according to a combination of the elements of the program: ‘Bicycle’ and ‘taXI’). BIXI was also the first bikesharing company in Canada, initially in Montreal in 2009, and to the Toronto downtown core on May 3, 2011.<sup>2</sup> Eighty solar-paneled stations were placed throughout the city (Figure 1). Each station consists of a pay station and bike docks (Figure 2), distributed according to population density, frequent travel paths, and frequent bicyclist locations.<sup>2</sup>

[insert Figure 1: BIXI bike docking station locations, Toronto, 2011]

Note: Each station is denoted by the BIXI symbol “”. Source: Toronto Life<sup>3</sup>

[insert Figure 2: BIXI bike kiosk, with pay station and bike dock, Toronto, 2011]

Users of BIXI bikes can subscribe for a 1-year or 30-day access pass, or they can rent a bike by purchasing a 24-hour or 72-hour access pass. Requirements stated for usage of the BIXI bikes are that cyclists are 18 years of age or older and at least 1.24 meters tall; however, after a credit card has been registered or an account has been created, there is no actual method of

1  
2  
3 monitoring who rides the bicycle. Furthermore, there is no requirement for helmets to be worn  
4  
5 while on the bicycle, though BIXI encourages riders to wear a helmet while cycling.<sup>2</sup>  
6  
7

8 Cyclists over 18 years of age in Toronto, make the choice of whether or not to wear a  
9  
10 bicycle helmet because helmet legislation in Ontario only applies to children. It has been  
11  
12 estimated that bicycle helmets decrease the risk of head injury by 85%.<sup>4</sup> The 2001-2007  
13  
14 Canadian Community Health Surveys showed that 41% of youth and adults in Ontario regularly  
15  
16 use helmets while cycling.<sup>5</sup> Recent observational data revealed that only 50% of cyclists use  
17  
18 helmets in the Greater Toronto Area.<sup>6</sup>  
19  
20  
21

22 In the City of Toronto, 13,475 collisions were reported between cyclists and motor  
23  
24 vehicles between 1986 and 1996, resulting in 38 cyclist fatalities.<sup>7</sup> In the US as high as 500,000  
25  
26 emergency care visits are attributable to injuries sustained while riding a bicycle in the US,  
27  
28 resulting in 900 deaths annually. Head injuries and facial traumas represent one-third of these  
29  
30 emergencies, with three quarters of all bicycle-related deaths being attributable to head injuries.<sup>8</sup>  
31  
32  
33

34 With the advent of the BIXI bikesharing system throughout downtown Toronto and the  
35  
36 promotion of bicycle use for commuters, we were interested in examining the prevalence of  
37  
38 helmet use by BIXI bike users. To our knowledge, no study has examined the prevalence of  
39  
40 helmet use in bikesharing programs. The current study compared the use of helmets by cyclists  
41  
42 choosing to use BIXI bikes to personal bike riders in the City of Toronto. We hypothesized that  
43  
44 the proportion of helmet users using BIXI bikes would be significantly lower than those on  
45  
46 personal bikes.  
47  
48  
49

## 50 **METHODS**

51  
52  
53 We used a prospective cohort study design to determine the proportion of helmet users in  
54  
55 downtown Toronto, Canada, for cyclists on personal bikes versus those on BIXI bikes. During an  
56  
57  
58  
59  
60

1  
2  
3 observational period of one hour, a researcher observed how many cyclists on personal bikes and  
4  
5 how many cyclists on BIXI bikes wore or did not wear helmets. Observations were made  
6  
7 between July and September 2011, and took place during weekday ‘commuter hours’ (i.e.  
8  
9 between 0700–1000 or between 1500–1800). As the BIXI bike main use is to facilitate  
10  
11 transportation along short distances,<sup>2</sup> and most of the cyclist commuter traffic occurs during  
12  
13 these ‘rush hour’ time periods, this time period was chosen to maximize the number of both  
14  
15 BIXI bike and personal bike cyclists observed.  
16  
17  
18

19  
20 The main exposure variable was type of bicycle. For the purposes of this study, a  
21  
22 "bicycle" or “bike” was defined by the researchers to constitute a 2- wheeled, non-fuel-  
23  
24 consuming, foot pedal-based method of transportation, where the rider is seated and can hold  
25  
26 handlebars in front of them. The “BIXI bike” was identified by its characteristic BIXI shape  
27  
28 and/or colours (Figure 2), whether being removed or returned from the docking station or being  
29  
30 ridden past the point of observation. A "personal bicycle" was defined as any bicycle of a brand  
31  
32 other than BIXI. The outcome of interest was helmet use. A "helmet" was defined for the  
33  
34 purposes of this project to constitute a solid protection device worn on the head, with a chinstrap,  
35  
36 as a means of promoting personal safety to protect the head from impact in the event of a fall or  
37  
38 collision. Observed sex of the bicycle riders was also recorded as a covariate to understand  
39  
40 differences in helmet use by sex.  
41  
42  
43  
44  
45

46 Using the map of the BIXI bike docking (Figure 1), operational docking stations were  
47  
48 assigned numbers from 1-79 sequentially from North-East to South-West. Twenty-five  
49  
50 operational stations were randomly selected to designate observation points for the study. During  
51  
52 each observation period, a researcher sat in a location with the BIXI bicycle docking station in  
53  
54 clear view and noted all cyclists within view (approximately 20m radius from the BIXI bicycle  
55  
56  
57  
58  
59  
60

## Helmet Use in BIXI Cyclists in Toronto

7

docking station), no matter which direction they were traveling. Cyclists of all ages were included in the study. No contact was made with the cyclists. Ethical approval was obtained from the research ethics review board at the Hospital for Sick Children in Toronto, Ontario.

A tally was collected for one of four categories: (1) BIXI bike riders with a helmet, (2) BIXI bike riders without a helmet, (3) personal bike riders with a helmet, or (4) personal bike riders without a helmet. Each category was subdivided by observed sex (male, female, unsure).

The required sample size for each of the two groups (BIXI bike cyclists and personal bike cyclists) was based on calculations using the formula for sample size calculations for two independent sample tests for proportions with an estimated effect size of 10%, and an estimated proportion of 50% of helmet use in personal bike users<sup>6</sup> for a two-sided test with a 5% level of significance, 80% power. The sample size calculation revealed that 407 subjects were needed per group.

Proportions of helmet users in BIXI bike cyclists and personal bike cyclists were calculated and compared between groups by Chi Square analysis using Epi Info (v.3.5.3) StatCalc. Each group was stratified by sex (male, female or “unsure”) and the proportion of helmet users within groups by sex was calculated.

## RESULTS

A total of 6732 cyclists were observed, including 306 BIXI bike cyclists and 6426 personal bike cyclists. When stratified by sex, a total of 4307 male cyclists and 2399 female cyclists were observed. Within groups, there were 234 male BIXI cyclists and 72 female BIXI cyclists, and 4073 male and 2327 female cyclists on personal bikes. For 24 helmet users and 2 non-helmet wearing cyclists on personal bikes, male or female designation could not be assigned; however, this represented a very small number of cyclists observed (0.4%) and thus



these observations were not included in the analysis by sex. The remaining 6706 observations were included in the analysis.

Twenty-one percent of bike riders wore helmets while on BIXI bikes. This was significantly lower than the prevalence of helmet use by personal bike riders (51.7%; uncorrected  $X^2 = 110.48$ ,  $p < 0.0001$ ). Both male and female personal bike riders were statistically significantly more likely to wear helmets compared to male and female BIXI bike riders (males: 47.9% versus 20.1%, respectively; uncorrected  $X^2 = 68.84$ ,  $p < 0.0001$ , females: 57.8% versus 23.6%, respectively; uncorrected  $X^2 = 33.26$ ,  $p < 0.0001$ ). The results for across group comparisons of helmet use in BIXI bike users and personal bike users are summarized in Table 1.

Compared to male bike riders, female bike riders were more likely to wear helmets. On personal bikes, females wore helmets more often than males (57.8% versus 47.9%, respectively;  $X^2 = 58.10$ ,  $p < 0.0001$ ). On BIXI bikes, females also wore helmets more often than did males, though this difference was not statistically significant (23.6% versus 20.1%, respectively;  $X^2 = 0.41$ ,  $p < 0.5201$ ).

Overall, whether riding a BIXI bike or a personal bike, 3384 of 6732 cyclists observed (50.3%) wore helmets. The observed prevalence of BIXI bike usage in Toronto was 4.5%.

**Table 1: Observed helmet use by bicycle type, Toronto, 2011**

|                         | BIXI BIKE  |            |            | PERSONAL BIKE |            |            | X <sup>2</sup> | P-value |
|-------------------------|------------|------------|------------|---------------|------------|------------|----------------|---------|
|                         | Riders (N) | Helmet (N) | Helmet (%) | Riders (N)    | Helmet (N) | Helmet (%) |                |         |
| Total observed          | 306        | 64         | 20.9%      | 6426          | 3320       | 51.7%      | 110.48         | <0.0001 |
| Females                 | 72         | 17         | 23.6%      | 2327          | 1345       | 57.8%      | 33.26          | <0.0001 |
| Males                   | 234        | 47         | 20.1%      | 4073          | 1951       | 47.9%      | 68.84          | <0.0001 |
| Could not determine sex | 0          | 0          | -          | 26            | 24         | 92.3%      | (not analyzed) |         |

## DISCUSSION

The proportion of BIXI bike users (64, 20.9%) who were wearing a helmet, regardless of sex, was significantly lower than the proportion of personal bike users (3320, 51.7%) wearing a helmet. This means that, although BIXI was introduced with the purpose to promote the use of cycling for short commutes within the city, the BIXI bike program appears to decrease the already-low proportion of helmet users. Since the use of helmets while cycling has been recognized as a means of reducing significant head injuries,<sup>4,9</sup> severe facial trauma and even death,<sup>8,10</sup> the advent of a bikesharing program that decreases helmet use may increase the risk of severe injury and/or fatalities in the event of a collision while cycling. This is especially dangerous in an urban center such as Toronto, where cyclists often are found alongside motor vehicles on busy streets in peak commuting hours.

As has been replicated in previous studies,<sup>6,11</sup> a large sex difference was observed both with respect to total cyclists and helmet users. Although females were less likely to ride a bicycle overall, females who did use a bicycle were more likely to wear a helmet. This same pattern translated to BIXI bike users as well, with females less likely to use the BIXI bikes.

This study represents the first investigation (to our knowledge) of helmet use in a bikesharing system. A similar pattern may extend to bikesharing systems worldwide. As of 2008, there have been fatalities reported while using bikesharing systems internationally: 3 fatalities in

1  
2  
3 Paris's Velib program, 3 collisions in New Zealand's NextBike, 1 collision in Hangzhou's  
4  
5 bikesharing system, and 1 in the North American BIXI system.<sup>1</sup> Given the nature of collision  
6  
7 data, these statistics may be underreported. Since helmet use has been shown to protect against  
8  
9 severe injuries and fatalities amongst collisions while cycling,<sup>8 10</sup> this suggests that bikesharing  
10  
11 systems, such as BIXI, should be accompanied by actions to promote helmet use. However, as  
12  
13 bikesharing programs cater to cyclists on-the-go within urban centers,<sup>1</sup> it is imperative that  
14  
15 solutions to promote helmet use be amenable to the commuter population and available at the  
16  
17 point of bike rental.  
18  
19  
20  
21

22  
23 One difficulty noted internationally is that helmet use may be legislated (or not) by a  
24  
25 municipal, state/province, or nationally country. In cities where helmet use is mandatory,  
26  
27 bikesharing systems have already begun to address the problem of low-helmet use, providing a  
28  
29 model through which other bikesharing systems may approach this dilemma in injury  
30  
31 prevention.<sup>12</sup> As helmets are mandatory for cyclists in Australia, a bikesharing system in  
32  
33 Melbourne piloted a project where helmets could be purchased or rented through vending  
34  
35 machines at the point of bike rental or at local convenience stores around the city.<sup>13</sup> Pending  
36  
37 helmet uptake data through this pilot, other bikesharing companies like BIXI could model this  
38  
39 project in order to promote helmet use within their consumers. BIXI bike could also work  
40  
41 towards providing machines near BIXI stations for helmet dispensing at the point of BIXI bike  
42  
43 rental.  
44  
45  
46  
47

48  
49 There are several limitations associated with the current study. This was the first study of  
50  
51 its kind to observe and count BIXI bike riders and personal bike riders. The fact that only one  
52  
53 observer who was not blinded to the hypothesis collected the data for the study could have  
54  
55 introduced a data collection bias. However, since the observer was measuring an objective  
56  
57  
58  
59  
60

1  
2  
3 outcome through the tallying of bicyclists in the area at each station, it is unlikely that any  
4  
5 significant personal or subjective bias was introduced. Furthermore, this study only observed  
6  
7 cyclists within the presumed 'commuter' hours within the downtown core, such that the main  
8  
9 population targeted for the study was cyclists commuting to work or to school. Previous studies  
10  
11 have found that statistics of helmet use vary with income and education,<sup>11</sup> though in this study,  
12  
13 all riders, regardless of attire or presumed reason for riding the bicycle, were counted towards the  
14  
15 study population. Furthermore, although all observations were made during commuter hours, the  
16  
17 locations of the randomly selected BIXI bike stations spanned many areas of downtown Toronto,  
18  
19 including financial districts, local parks, intercity areas, and school campuses.<sup>2</sup> This layout in  
20  
21 BIXI bike stations allows the program to cater to a wide array of Torontonians, and helped to  
22  
23 increase the diversity of our study population to be representative of the natural Toronto  
24  
25 population. Finally, this study did not classify cyclists by age; as a result, all analyses were  
26  
27 conducted regardless of the age of the cyclists. Patterns of helmet use have been reported to vary  
28  
29 with age, with youth and adolescents in Ontario most likely to wear a helmet.<sup>11</sup> Since the  
30  
31 majority of the population observed consisted mainly of older youth and adults, it is unlikely that  
32  
33 the presence of children under the helmet legislation would have significantly impacted the  
34  
35 study's results.  
36  
37  
38  
39  
40  
41  
42

43  
44 With an increasing focus on Toronto to be a healthy, environmentally-friendly city,  
45  
46 cycling continues to be a promising sustainable means of transportation. Although the BIXI bike  
47  
48 program has provided an alternate means for Torontonians to use a bicycle that is publically  
49  
50 available for short-term, within-city routes,<sup>2</sup> its indirect negative effect on helmet use for cyclists  
51  
52 poses a threat to cyclists' safety. Efforts to promote cycling while protecting cyclists from severe  
53  
54 injury should be made a priority in the promotion of a healthy and safe Toronto.  
55  
56  
57  
58  
59  
60

**AUTHOR CONTRIBUTIONS**

Marissa Bonyun: Study design, data collection, data analysis and interpretation, writing and editing of the manuscript, final approval of the manuscript.

Andi Camden: Study design, data analysis and interpretation, writing and editing of the manuscript, final approval of the manuscript.

Colin Macarthur: Consultation on design, data interpretation, writing and editing of the manuscript, final approval of the manuscript.

Andrew Howard: Conceptual framework and study design, data analysis and interpretation, writing and editing of the manuscript, final approval of the manuscript.

**DATA SHARING**

No additional data available.

**COMPETING INTERESTS**

None to declare.

**SOURCE OF FUNDING**

This research received no specific funding.

**REFERENCES**

1. Shaheen S, Guzman S, Zhang H. Bikesharing in Europe, the Americas, and Asia: Past, Present, and Future.: UC Davis: Institute of Transportation Studies., 2010.
2. BIXI. BIXI Toronto Online, 2011.
3. Vaccaro M. Check out BIXI Toronto's 80 downtown bike locations on one interactive map: Toronto Life Online, 2011.
4. Thompson RS, Rivara FP, Thompson DC. A case-control study of the effectiveness of bicycle safety helmets. *New England Journal of Medicine* 1989;320(21):1361-67.
5. Dennis J, Potter B, Ramsay T, et al. The effects of provincial bicycle helmet legislation on helmet use and bicycle ridership in Canada. *Injury Prevention* 2010;16(4):219-24.
6. Page JL, Macpherson AK, Middaugh-Bonney T, et al. Prevalence of helmet use by users of bicycles, push scooters, inline skates and skateboards in Toronto and the surrounding area in the absence of comprehensive legislation: an observational study. *Injury Prevention* 2011;[Epub ahead of print: August 26, 2011].
7. Lucas WJ. A report on cycling fatalities in Toronto 1986-1998 – recommendations for reducing cycling injuries and death. *Chief Coroner, Province of Ontario*, 1998.
8. Thompson D, Rivara F, Thompson R. Helmets for preventing head and facial injuries in bicyclists (review). *Cochrane Database of Systematic Reviews* 2009.
9. Macpherson A, Spinks A. Bicycle helmet legislation for the uptake of helmet use and prevention of head injuries (review). *Cochrane Database of Systematic Reviews* 2008(3).
10. Attewell RG, Glase K, McFadden M. Bicycle helmet efficacy: a meta-analysis. *Accid Anal Prev* 2001;33(3):345-52.
11. Irvine A, Rowe BH, Sahai V. Bicycle helmet-wearing variation and associated factors in Ontario teenagers and adults. *Canadian Journal of Public Health* 2002;93(5):368-73.

- 1  
2  
3  
4  
5  
6  
7  
8  
9  
10  
11  
12  
13  
14  
15  
16  
17  
18  
19  
20  
21  
22  
23  
24  
25  
26  
27  
28  
29  
30  
31  
32  
33  
34  
35  
36  
37  
38  
39  
40  
41  
42  
43  
44  
45  
46  
47  
48  
49  
50  
51  
52  
53  
54  
55  
56  
57  
58  
59  
60
12. Midgley P. Bicycle-sharing schemes: enhancing sustainable mobility in urban areas. In: Development CoS, editor. New York: United Nations - Department of Economic and Social Affairs.
13. VicRoads. Melbourne bike share (the blue bikes). 2006.

For peer review only



1  
2  
3  
4  
5  
6  
7  
8  
9  
10  
11  
12  
13  
14  
15  
16  
17  
18  
19  
20  
21  
22  
23  
24  
25  
26  
27  
28  
29  
30  
31  
32  
33  
34  
35  
36  
37  
38  
39  
40  
41  
42  
43  
44  
45  
46  
47  
48  
49  
50  
51  
52  
53  
54  
55  
56  
57  
58  
59  
60

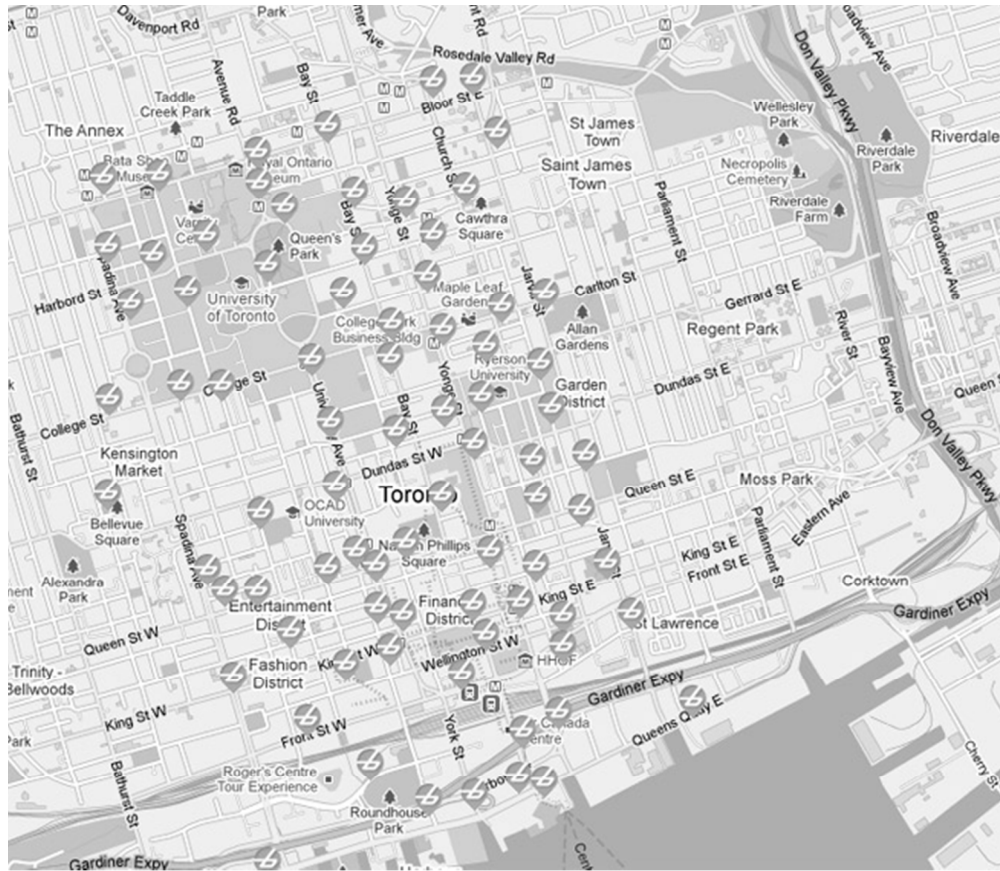

Figure 1: BIXI bike docking station locations, Toronto, 2011  
55x48mm (300 x 300 DPI)



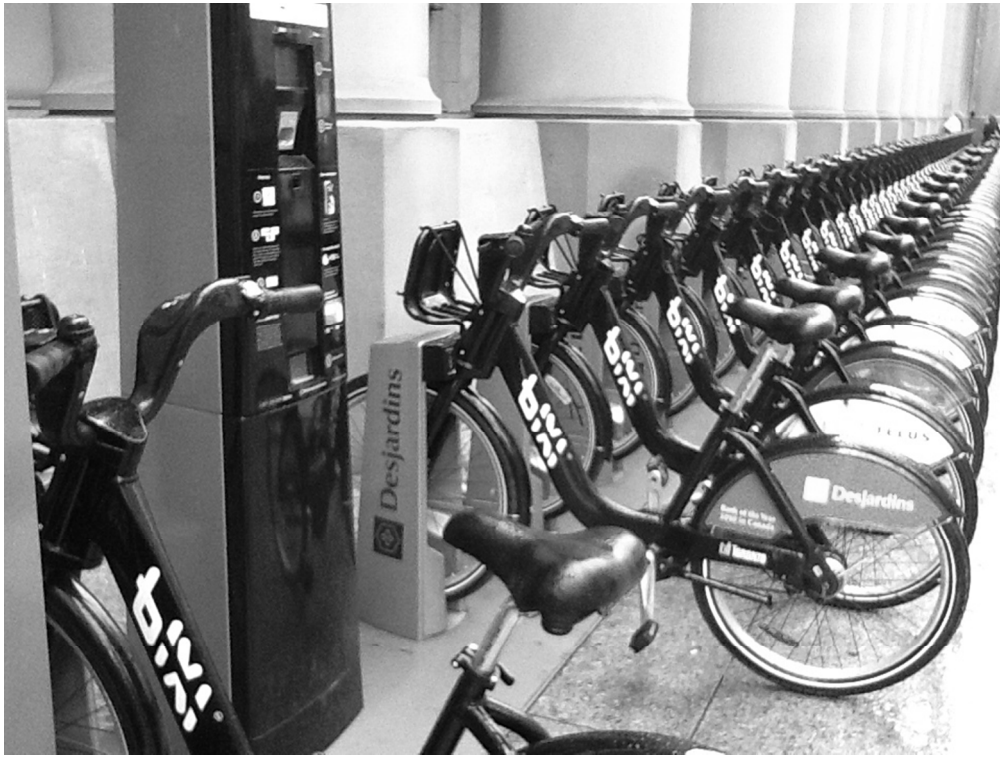

Figure 2: BIXI bike kiosk, with pay station and bike dock, Toronto, 2011  
81x60mm (300 x 300 DPI)

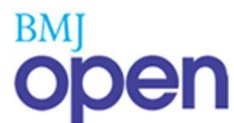

## Helmet use in BIXI cyclists in Toronto, Canada: An observational study

|                                 |                                                                                                                                                                                                                                                                                                                                                    |
|---------------------------------|----------------------------------------------------------------------------------------------------------------------------------------------------------------------------------------------------------------------------------------------------------------------------------------------------------------------------------------------------|
| Journal:                        | <i>BMJ Open</i>                                                                                                                                                                                                                                                                                                                                    |
| Manuscript ID:                  | bmjopen-2012-001049.R1                                                                                                                                                                                                                                                                                                                             |
| Article Type:                   | Research                                                                                                                                                                                                                                                                                                                                           |
| Date Submitted by the Author:   | 08-May-2012                                                                                                                                                                                                                                                                                                                                        |
| Complete List of Authors:       | Bonyun, Marissa; University of Toronto, Faculty of Medicine<br>Camden, Andi; The Hospital for Sick Children, Child Health Evaluative Sciences;<br>Macarthur, Colin; The Hospital for Sick Children, Child Health Evaluative Sciences; University of Toronto, Department of Paediatrics<br>Howard, Andrew; Hospital for Sick Children, Orthopaedics |
| <b>Primary Subject Heading</b>: | Public health                                                                                                                                                                                                                                                                                                                                      |
| Secondary Subject Heading:      | Epidemiology, Sports and exercise medicine                                                                                                                                                                                                                                                                                                         |
| Keywords:                       | PUBLIC HEALTH, Traffic/Prevention & Control, Injury Prevention, Head Protective Devices                                                                                                                                                                                                                                                            |
|                                 |                                                                                                                                                                                                                                                                                                                                                    |

SCHOLARONE™  
Manuscripts

**Helmet use in BIXI cyclists in Toronto, Canada: An observational study**

Marissa Bonyun, BHSc<sup>c</sup>, Andi Camden, MPH<sup>a</sup>, Colin Macarthur, MBChB, PhD<sup>a,g</sup>,

Andrew Howard, MD, MSc FRCSC<sup>a,b,e,f</sup>

Child Health Evaluative Sciences<sup>a</sup>; Orthopaedic Surgery<sup>b</sup>, The Hospital for Sick Children,

Toronto, Canada

Faculty of Medicine<sup>c</sup>; Department of Surgery<sup>e</sup>; Health Policy, Management and Evaluation<sup>f</sup>,

Department of Paediatrics<sup>g</sup>, University of Toronto, Toronto, Canada

Word Count – Manuscript: 2295, Abstract: 156

MeSH terms: Head Protective Devices; Bicycling; Accidents, Traffic/Prevention & Control;

Canada

Corresponding Author:

Dr. Andrew Howard, the Hospital for Sick Children

555 University Avenue, Room S-107

Toronto, ON M5G 1X8

Phone: 416 813 6430, Fax: 416 813 6414, Email: andrew.howard@sickkids.ca

## ARTICLE SUMMARY

### Article Focus

1. We investigated the use of helmets for cyclists choosing to use BIXI bikes in comparison to personal bike riders in the City of Toronto.
2. We hypothesized that the proportion of helmet users using BIXI bikes would be significantly lower than those on personal bikes.

### Key Messages

1. Cyclists using BIXI bikes in Toronto are less likely to wear a helmet than cyclists riding their own bike; only 20.9% of all BIXI cyclists wear helmets compared to 51.7% of cyclists riding a personal bike.
2. More males than females ~~are ride bicycles in Toronto using the BIXI bikesharing program.~~
3. Females in Toronto were more likely to wear a helmet while cycling.

**Strengths:** This is the first study (to our knowledge) investigating helmet use in a bikesharing system. Additional strengths include the prospective study design, number of observations, randomly selected observation sites and stratified analyses by sex.

**Limitations:** The data was collected by one observer not blinded to the study hypothesis, observations were limited to presumed commuter hours in the downtown core of Toronto and we were unable to account for variables previously associated with helmet use, including income, education and age.

**ABSTRACT**

Objective: To investigate the use of helmets for cyclists choosing to use BIXI bikes in comparison to personal bike riders in the City of Toronto.

Design: ~~Prospective cohort~~ Cross sectional study design

Setting: Cyclists were observed in Toronto, Canada

Participants: Of the 6732 sample size, 306 cyclists on BIXI bikes and 6426 personal bike riders were observed.

Outcome measure: The outcome of interest was helmet use.

Results: Overall, 50.3% of cyclists wore helmets. The proportion of BIXI bike riders using helmets was significantly lower than the proportion of helmet users on personal bikes (20.9% versus 51.7%, respectively,  $p < 0.0001$ ).

Conclusions: Although the BIXI bike program has provided an alternate means for Torontonians to use a bicycle, cyclists using BIXI bikes are much less likely to wear a helmet. Since the prevalence of helmet use in cyclists in general is already low, helmet use should be especially promoted in BIXI bike riders in order to promote a safe and healthy environment for cyclists.

## INTRODUCTION

Urban cycling promotes healthy living and also minimizes environmental pollutants from vehicle emissions. Bikesharing initiatives, therefore, provide communities with a means to an active, healthy lifestyle via a sustainable means of transportation.<sup>1</sup>

Multiple variations of bikesharing programs have evolved across the world in the last 46 years, yet the core design amongst all programs remains the same – a finite number of bikes are placed throughout a community for citizens and visitors to ‘borrow’ at their leisure for shorter commutes within designated community zones.<sup>1</sup> The target population for these programs is within-city commuters who can benefit from the use of a temporary bicycle and avoid the worry of parking and locking a bike while at their destination.

The most prominent bikesharing program in North America is BIXI (named according to a combination of the elements of the program: ‘Bicycle’ and ‘taXI’). BIXI was also the first bikesharing company in Canada, initially in Montreal in 2009, and to the Toronto downtown core on May 3, 2011.<sup>2</sup> Eighty solar-paneled stations were placed throughout the city. (Figure 1). Each station consists of a pay station and bike docks (Figure 2), distributed according to population density, frequent travel paths, and frequent bicyclist locations.<sup>2</sup>

Note: Each station is denoted by the BIXI symbol “”. Source: Toronto Life<sup>3</sup>

Users of BIXI bikes can subscribe for a 1-year or 30-day access pass, or they can rent a bike by purchasing a 24-hour or 72-hour access pass. Requirements stated for usage of the BIXI bikes are that cyclists are 18 years of age or older and at least 1.24 meters tall; however, after a credit card has been registered or an account has been created, there is no actual method of monitoring who rides the bicycle. Furthermore, there is no requirement for helmets to be worn while on the bicycle, though BIXI encourages riders to wear a helmet while cycling.<sup>2</sup>

Cyclists over 18 years of age in Toronto, make the choice of whether or not to wear a bicycle helmet because helmet legislation in Ontario only applies to children. It ~~has been~~ was initially estimated that bicycle helmets decrease the risk of head injury by 85%.<sup>4</sup> More recent estimates question whether the protective effect is that high, but meta-analyses consistently demonstrate that bicycle helmets prevent head injuries.<sup>5</sup> The 2001-2007 Canadian Community Health Surveys showed that 41% of youth and adults in Ontario regularly use helmets while cycling.<sup>6</sup> Recent observational data revealed that only 50% of cyclists use helmets in the Greater Toronto Area.<sup>7</sup>

In the City of Toronto, 13,475 collisions were reported between cyclists and motor vehicles between 1986 and 1996, resulting in 38 cyclist fatalities.<sup>8</sup> In the US as high as 500,000 emergency care visits are attributable to injuries sustained while riding a bicycle in the US, resulting in 900 deaths annually. Head injuries and facial traumas represent one-third of these emergencies, with three quarters of all bicycle-related deaths being attributable to head injuries.<sup>9</sup>

With the advent of the BIXI bikesharing system throughout downtown Toronto and the promotion of bicycle use for commuters, we were interested in examining the prevalence of helmet use by BIXI bike users. To our knowledge, no study has examined the prevalence of helmet use in bikesharing programs. The current study compared the use of helmets by cyclists choosing to use BIXI bikes to personal bike riders in the City of Toronto. We hypothesized that the proportion of helmet users using BIXI bikes would be significantly lower than those on personal bikes because there is no way to obtain a helmet at the same time as a BIXI ~~is~~ is hired. There is little data about helmet use in bikesharing systems but the information available suggests lower helmet use if the helmet is not supplied with the bike.<sup>10</sup>

## METHODS

We used a ~~cross sectional~~~~prospective cohort study~~ design to determine the proportion of helmet users in downtown Toronto, Canada, for cyclists on personal bikes versus those on BIXI bikes. During an observational period of one hour, a researcher observed how many cyclists on personal bikes and how many cyclists on BIXI bikes wore or did not wear helmets. Observations were made between July and September 2011, and took place during weekday 'commuter hours' (i.e. between 0700–1000 or between 1500–1800). As the BIXI bike main use is to facilitate transportation along short distances,<sup>2</sup> and most of the cyclist commuter traffic occurs during these 'rush hour' time periods, this time period was chosen to maximize the number of both BIXI bike and personal bike cyclists observed.

The main exposure variable was type of bicycle. For the purposes of this study, a "bicycle" or "bike" was defined by the researchers to constitute a 2- wheeled, non-fuel-consuming, foot pedal-based method of transportation, where the rider is seated and can hold handlebars in front of them. The "BIXI bike" was identified by its characteristic BIXI shape and/or colours (Figure 2), whether being removed or returned from the docking station or being ridden past the point of observation. A "personal bicycle" was defined as any bicycle of a brand other than BIXI. The outcome of interest was helmet use. A "helmet" was defined for the purposes of this project to constitute a solid protection device worn on the head, with a chinstrap, as a means of promoting personal safety to protect the head from impact in the event of a fall or collision. Observed sex of the bicycle riders was also recorded as a covariate to understand differences in helmet use by sex.

Using the map of the BIXI bike docking (Figure 1), operational docking stations were assigned numbers from 1-79 sequentially from North-East to South-West. Twenty-five operational stations were randomly selected to designate observation points for the study. During



## Helmet Use in BIXI Cyclists in Toronto

7

each observation period, a researcher sat in a location with the BIXI bicycle docking station in clear view and noted all cyclists within view (approximately 20m radius from the BIXI bicycle docking station), no matter which direction they were traveling. Cyclists of all ages were included in the study. No contact was made with the cyclists. Ethical approval was obtained from the research ethics review board at the Hospital for Sick Children in Toronto, Ontario.

A tally was collected for one of four categories: (1) BIXI bike riders with a helmet, (2) BIXI bike riders without a helmet, (3) personal bike riders with a helmet, or (4) personal bike riders without a helmet. Each category was subdivided by observed sex (male, female, unsure).

The required sample size for each of the two groups (BIXI bike cyclists and personal bike cyclists) was based on calculations using the formula for sample size calculations for two independent sample tests for proportions with an estimated effect size of 10%, and an estimated proportion of 50% of helmet use in personal bike users<sup>7</sup> for a two-sided test with a 5% level of significance, 80% power. The sample size calculation revealed that 407 subjects were needed per group.

Proportions of helmet users in BIXI bike cyclists and personal bike cyclists were calculated and compared between groups by Chi Square analysis using Epi Info (v.3.5.3) StatCalc. Each group was stratified by sex (male, female or “unsure”) and the proportion of helmet users within groups by sex was calculated.

## RESULTS

A total of 6732 cyclists were observed, including 306 BIXI bike cyclists and 6426 personal bike cyclists. When stratified by sex, a total of 4307 male cyclists and 2399 female cyclists were observed. Within groups, there were 234 male BIXI cyclists and 72 female BIXI cyclists, and 4073 male and 2327 female cyclists on personal bikes. For 24 helmet users and 2

## Helmet Use in BIXI Cyclists in Toronto

8

1  
2  
3 non-helmet wearing cyclists on personal bikes, male or female designation could not be  
4  
5 assigned; however, this represented a very small number of cyclists observed (0.4%) and thus  
6  
7 these observations were not included in the analysis by sex. The remaining 6706 observations  
8  
9 were included in the analysis.  
10  
11

12  
13 Twenty-one percent of bike riders wore helmets while on BIXI bikes. This was  
14  
15 significantly lower than the prevalence of helmet use by personal bike riders (51.7%; uncorrected  
16  
17  $X^2 = 110.48$ ,  $p < 0.0001$ ). Both male and female personal bike riders were statistically  
18  
19 significantly more likely to wear helmets compared to male and female BIXI bike riders (males:  
20  
21 47.9% versus 20.1%, respectively; uncorrected  $X^2 = 68.84$ ,  $p < 0.0001$ , females: 57.8% versus  
22  
23 23.6%, respectively; uncorrected  $X^2 = 33.26$ ,  $p < 0.0001$ ). The results for across group  
24  
25 comparisons of helmet use in BIXI bike users and personal bike users are summarized in Table  
26  
27 1.  
28  
29  
30  
31

32 Compared to male bike riders, female bike riders were more likely to wear helmets. On  
33  
34 personal bikes, females wore helmets more often than males (57.8% versus 47.9%, respectively;  
35  
36  $X^2 = 58.10$ ,  $p < 0.0001$ ). On BIXI bikes, ~~females also wore helmets more often than did males,~~  
37  
38 ~~though this gender~~ differences ~~was in helmet use were~~ not statistically significant (23.6% of  
39  
40 females versus 20.1% of males, respectively;  $X^2 = 0.41$ ,  $p < 0.5201$ ).  
41  
42  
43

44 Overall, whether riding a BIXI bike or a personal bike, 3384 of 6732 cyclists observed  
45  
46 (50.3%) wore helmets. The observed prevalence of BIXI bike usage in Toronto was 4.5%.  
47  
48  
49  
50  
51  
52  
53  
54  
55  
56  
57  
58  
59  
60

**Table 1: Observed helmet use by bicycle type, Toronto, 2011**

|                         | BIXI BIKE  |            |            | PERSONAL BIKE |            |            | X <sup>2</sup> | P-value |
|-------------------------|------------|------------|------------|---------------|------------|------------|----------------|---------|
|                         | Riders (N) | Helmet (N) | Helmet (%) | Riders (N)    | Helmet (N) | Helmet (%) |                |         |
| Total observed          | 306        | 64         | 20.9%      | 6426          | 3320       | 51.7%      | 110.48         | <0.0001 |
| Females                 | 72         | 17         | 23.6%      | 2327          | 1345       | 57.8%      | 33.26          | <0.0001 |
| Males                   | 234        | 47         | 20.1%      | 4073          | 1951       | 47.9%      | 68.84          | <0.0001 |
| Could not determine sex | 0          | 0          | -          | 26            | 24         | 92.3%      | (not analyzed) |         |

## DISCUSSION

The proportion of BIXI bike users (64, 20.9%) who were wearing a helmet, regardless of sex, was significantly lower than the proportion of personal bike users (3320, 51.7%) wearing a helmet. This means that, although BIXI was introduced with the purpose to promote the use of cycling for short commutes within the city, the BIXI bike program appears to decrease the already-low proportion of helmet users. Since the use of helmets while cycling has been recognized as a means of reducing significant head injuries,<sup>4 11</sup> severe facial trauma and even death,<sup>9 12</sup> the advent of a bikesharing program that decreases helmet use may increase the risk of severe injury and/or fatalities in the event of a collision while cycling. This is especially dangerous in an urban center such as Toronto, where cyclists often are found alongside motor vehicles on busy streets in peak commuting hours.

As has been replicated in previous studies,<sup>6 13</sup> a large sex difference was observed both with respect to total cyclists and helmet users. Although females were less likely to ride a bicycle overall, females who did use a bicycle were more likely to wear a helmet. This same pattern translated to BIXI bike users as well, with females less likely to use the BIXI bikes.

This study represents the first investigation (to our knowledge) of helmet use in a bikesharing system. A similar pattern may extend to bikesharing systems worldwide. As of 2008, there have been fatalities reported while using bikesharing systems internationally: 3 fatalities in

1  
2  
3 Paris's Velib program, 3 collisions in New Zealand's NextBike, 1 collision in Hangzhou's  
4  
5 bikesharing system, and 1 in the North American BIXI system.<sup>1</sup> Given the nature of collision  
6  
7 data, these statistics may be underreported. Since helmet use has been shown to protect against  
8  
9 severe injuries and fatalities amongst collisions while cycling,<sup>9,12</sup> this suggests that bikesharing  
10  
11 systems, such as BIXI, should be accompanied by actions to promote helmet use. However, as  
12  
13 bikesharing programs cater to cyclists on-the-go within urban centers,<sup>1</sup> it is imperative that  
14  
15 solutions to promote helmet use be amenable to the commuter population and available at the  
16  
17 point of bike rental.  
18  
19  
20  
21

22 One difficulty noted internationally is that helmet use may be legislated (or not) by a  
23  
24 municipal, state/province, or nationally country. In cities where helmet use is mandatory,  
25  
26 bikesharing systems have already begun to address the problem of low-helmet use, providing a  
27  
28 model through which other bikesharing systems may approach this dilemma in injury  
29  
30 prevention.<sup>14</sup> As helmets are mandatory for cyclists in Australia, a bikesharing system in  
31  
32 Melbourne piloted a project where helmets could be purchased or rented through vending  
33  
34 machines at the point of bike rental or at local convenience stores around the city.<sup>15</sup> Pending  
35  
36 helmet uptake data through this pilot, other bikesharing companies like BIXI could model this  
37  
38 project in order to promote helmet use within their consumers. BIXI bike could also work  
39  
40 towards providing machines near BIXI stations for helmet dispensing at the point of BIXI bike  
41  
42 rental.  
43  
44  
45  
46  
47

48 There are several limitations associated with the current study. This was the first study of  
49  
50 its kind to observe and count BIXI bike riders and personal bike riders. The fact that only one  
51  
52 observer who was not blinded to the hypothesis collected the data for the study could have  
53  
54 introduced a data collection bias. However, since the observer was measuring an objective  
55  
56  
57  
58  
59  
60

## Helmet Use in BIXI Cyclists in Toronto

11

1  
2  
3 outcome through the tallying of bicyclists in the area at each station, it is unlikely that any  
4  
5 significant personal or subjective bias was introduced. Furthermore, this study only observed  
6  
7 cyclists within the presumed 'commuter' hours within the downtown core, such that the main  
8  
9 population targeted for the study was cyclists commuting to work or to school. Previous studies  
10  
11 have found that statistics of helmet use vary with income and education,<sup>13</sup> though in this study,  
12  
13 all riders, regardless of attire or presumed reason for riding the bicycle, were counted towards the  
14  
15 study population. Furthermore, although all observations were made during commuter hours, the  
16  
17 locations of the randomly selected BIXI bike stations spanned many areas of downtown Toronto,  
18  
19 including financial districts, local parks, intercity areas, and school campuses.<sup>2</sup> This layout in  
20  
21 BIXI bike stations allows the program to cater to a wide array of Torontonians, and helped to  
22  
23 increase the diversity of our study population to be representative of the natural Toronto  
24  
25 population. This study did not classify cyclists by age; as a result, all analyses were conducted  
26  
27 regardless of the age of the cyclists. Patterns of helmet use have been reported to vary with age,  
28  
29 with youth and adolescents in Ontario most likely to wear a helmet.<sup>13</sup> ~~Since the majority of the~~  
30  
31 ~~population observed consisted mainly of older youth and adults, BIXI bicycles are only available~~  
32  
33 ~~for those 18 and over, so~~ it is unlikely that the presence of children under the helmet legislation  
34  
35 would have significantly impacted the study's results. ~~Finally, individual cyclists were not~~  
36  
37 ~~identified so may have been observed more than once.~~  
38  
39  
40  
41  
42  
43  
44  
45

46 With an increasing focus on Toronto to be a healthy, environmentally friendly city,  
47  
48 cycling continues to be a promising sustainable means of transportation. Although the BIXI bike  
49  
50 program has provided an alternate means for Torontonians to use a bicycle that is publically  
51  
52 available for short-term, within-city routes,<sup>2</sup> its indirect negative effect on helmet use for cyclists  
53  
54  
55  
56  
57  
58  
59  
60

1  
2  
3 poses a threat to cyclists' safety. Efforts to promote cycling while protecting cyclists from severe  
4  
5  
6 injury should be made a priority in the promotion of a healthy and safe Toronto.  
7  
8  
9  
10  
11  
12  
13  
14  
15  
16  
17  
18  
19  
20  
21  
22  
23  
24  
25  
26  
27  
28  
29  
30  
31  
32  
33  
34  
35  
36  
37  
38  
39  
40  
41  
42  
43  
44  
45  
46  
47  
48  
49  
50  
51  
52  
53  
54  
55  
56  
57  
58  
59  
60

For peer review only

1 Helmet Use in BIXI Cyclists in Toronto

13

2  
3 **AUTHOR CONTRIBUTIONS**

4  
5 Marissa Bonyun: Study design, data collection, data analysis and interpretation, writing and  
6 editing of the manuscript, final approval of the manuscript.  
7

8  
9 Andi Camden: Study design, data analysis and interpretation, writing and editing of the  
10 manuscript, final approval of the manuscript.  
11

12  
13 Colin Macarthur: Consultation on design, data interpretation, writing and editing of the  
14 manuscript, final approval of the manuscript.  
15

16  
17 Andrew Howard: Conceptual framework and study design, data analysis and interpretation,  
18 writing and editing of the manuscript, final approval of the manuscript.  
19

20  
21 **DATA SHARING**

22  
23 No additional data available.  
24  
25

26  
27  
28 **COMPETING INTERESTS**

29  
30 None to declare.  
31  
32

33  
34 **SOURCE OF FUNDING**

35  
36 This research received no specific funding.  
37  
38  
39  
40  
41  
42  
43  
44  
45  
46  
47  
48  
49  
50  
51  
52  
53  
54  
55  
56  
57  
58  
59  
60

---

**REFERENCES**

1. Shaheen S, Guzman S, Zhang H. Bikesharing in Europe, the Americas, and Asia: Past, Present, and Future.: UC Davis: Institute of Transportation Studies., 2010.
2. BIXI. BIXI Toronto Online, 2011.
3. Vaccaro M. Check out BIXI Toronto's 80 downtown bike locations on one interactive map: Toronto Life Online, 2011.
4. Thompson RS, Rivara FP, Thompson DC. A case-control study of the effectiveness of bicycle safety helmets. *New England Journal of Medicine* 1989;320(21):1361-67.
5. Elvik R. Publication bias and time-trend bias in meta-analysis of bicycle helmet efficacy: a re-analysis of Attewell, Glase and McFadden, 2001. *Accid Anal Prev* 2011;43(3):1245-51.
6. Dennis J, Potter B, Ramsay T, et al. The effects of provincial bicycle helmet legislation on helmet use and bicycle ridership in Canada. *Injury Prevention* 2010;16(4):219-24.
7. Page JL, Macpherson AK, Middaugh-Bonney T, et al. Prevalence of helmet use by users of bicycles, push scooters, inline skates and skateboards in Toronto and the surrounding area in the absence of comprehensive legislation: an observational study. *Injury Prevention* 2011;[Epub ahead of print: August 26, 2011].
8. Lucas WJ. A report on cycling fatalities in Toronto 1986-1998 – recommendations for reducing cycling injuries and death. *Chief Coroner, Province of Ontario*, 1998.
9. Thompson D, Rivara F, Thompson R. Helmets for preventing head and facial injuries in bicyclists (review). *Cochrane Database of Systematic Reviews* 2009.



- 1  
2  
3  
4  
5 10. Constant A, Messiah A, Felonneau ML, Lagarde E. Investigating helmet promotion for cyclists:  
6  
7 results from a randomised study with observation of behaviour, using a semi-automatic video  
8  
9 system. *PLoS One* 2012;7(2):e31651.
- 10  
11 11. Macpherson A, Spinks A. Bicycle helmet legislation for the uptake of helmet use and  
12  
13 prevention of head injuries (review). *Cochrane Database of Systematic Reviews* 2008(3).
- 14  
15 12. Attewell RG, Glase K, McFadden M. Bicycle helmet efficacy: a meta-analysis. *Accid Anal*  
16  
17 *Prev* 2001;33(3):345-52.
- 18  
19 13. Irvine A, Rowe BH, Sahai V. Bicycle helmet-wearing variation and associated factors in  
20  
21 Ontario teenagers and adults. *Canadian Journal of Public Health* 2002;93(5):368-73.
- 22  
23 14. Midgley P. Bicycle-sharing schemes: enhancing sustainable mobility in urban areas. In:  
24  
25 Development CoS, editor. New York: United Nations - Department of Economic and  
26  
27 Social Affairs.  
28  
29  
30  
31
- 32 15. VicRoads. Melbourne bike share (the blue bikes). 2006.  
33  
34  
35  
36  
37  
38  
39  
40  
41  
42  
43  
44  
45  
46  
47  
48  
49  
50  
51  
52  
53  
54  
55  
56  
57  
58  
59  
60

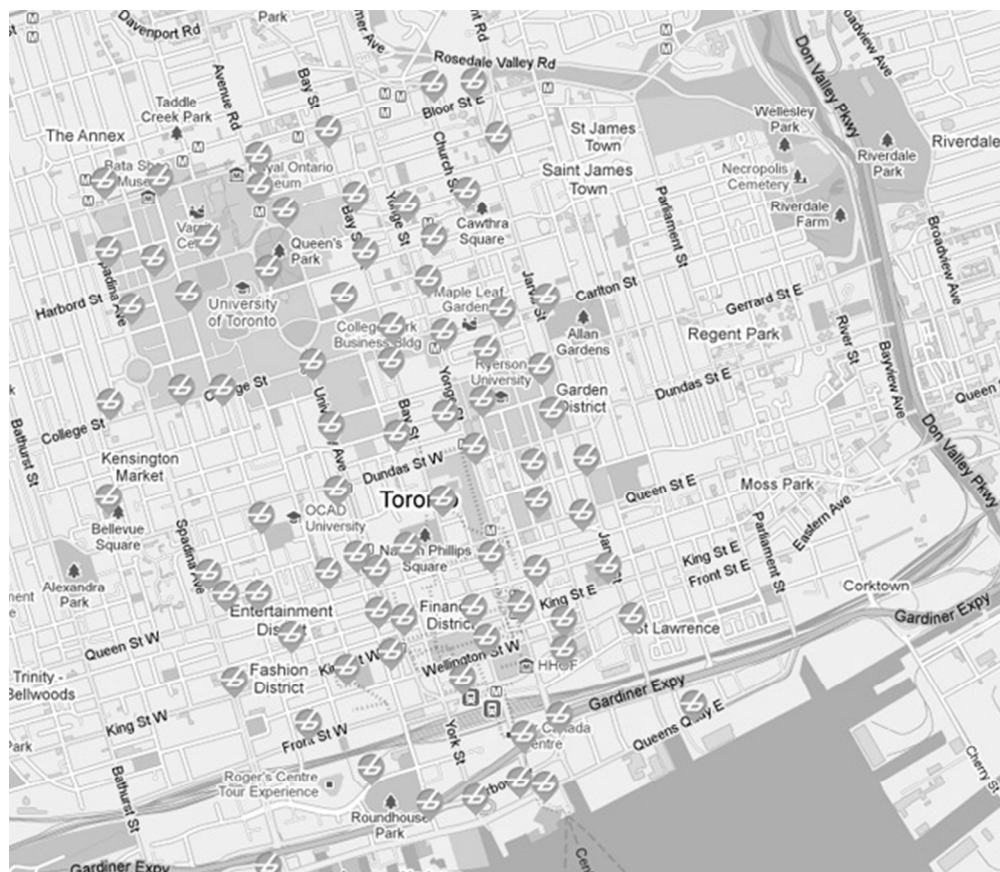

Figure 1: BIXI bike docking station locations, Toronto, 2011  
55x48mm (300 x 300 DPI)

1  
2  
3  
4  
5  
6  
7  
8  
9  
10  
11  
12  
13  
14  
15  
16  
17  
18  
19  
20  
21  
22  
23  
24  
25  
26  
27  
28  
29  
30  
31  
32  
33  
34  
35  
36  
37  
38  
39  
40  
41  
42  
43  
44  
45  
46  
47  
48  
49  
50  
51  
52  
53  
54  
55  
56  
57  
58  
59  
60

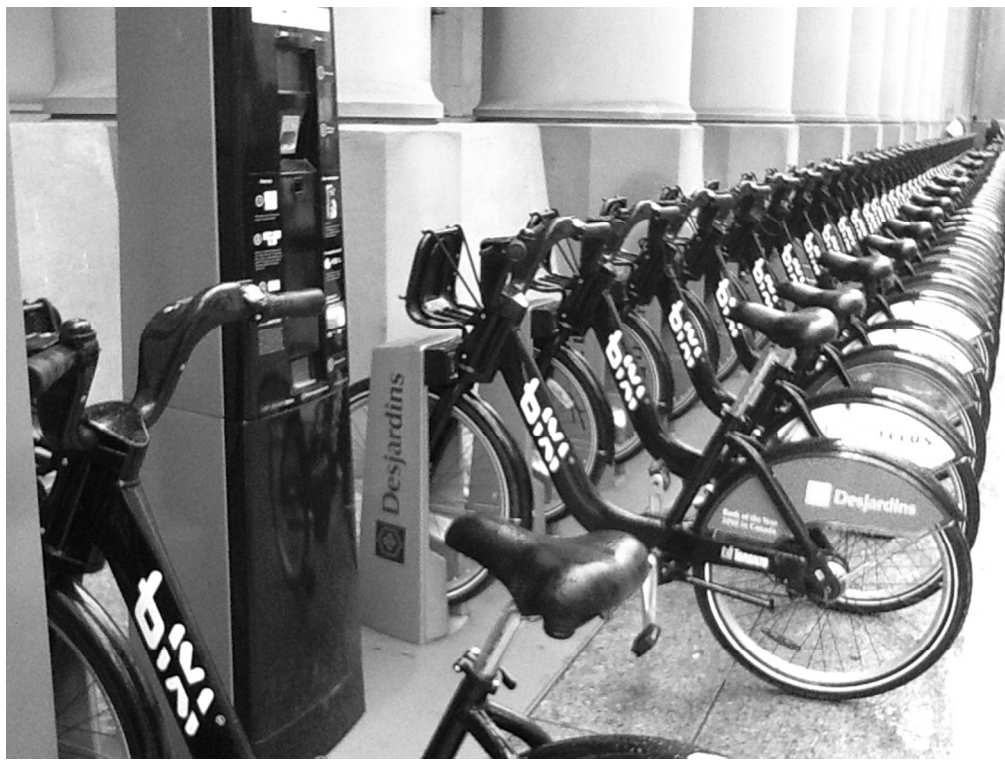

Figure 2: BIXI bike kiosk, with pay station and bike dock, Toronto, 2011  
81x60mm (300 x 300 DPI)

Review only

## Helmet use in BIXI cyclists in Toronto, Canada: An observational study

Marissa Bonyun, BHSc<sup>c</sup>, Andi Camden, MPH<sup>a</sup>, Colin Macarthur, MBChB, PhD<sup>a,g</sup>,

Andrew Howard, MD, MSc FRCSC<sup>a,b,e,f</sup>

Child Health Evaluative Sciences<sup>a</sup>; Orthopaedic Surgery<sup>b</sup>, The Hospital for Sick Children,  
Toronto, Canada

Faculty of Medicine<sup>c</sup>; Department of Surgery<sup>e</sup>; Health Policy, Management and Evaluation<sup>f</sup>,  
Department of Paediatrics<sup>g</sup>, University of Toronto, Toronto, Canada

Word Count – Manuscript: 2295, Abstract: 156

MeSH terms: Head Protective Devices; Bicycling; Accidents, Traffic/Prevention & Control;  
Canada

Corresponding Author:

Dr. Andrew Howard, the Hospital for Sick Children

555 University Avenue, Room S-107

Toronto, ON M5G 1X8

Phone: 416 813 6430, Fax: 416 813 6414, Email: andrew.howard@sickkids.ca

## ARTICLE SUMMARY

### Article Focus

1. We investigated the use of helmets for cyclists choosing to use BIXI bikes in comparison to personal bike riders in the City of Toronto.
2. We hypothesized that the proportion of helmet users using BIXI bikes would be significantly lower than those on personal bikes.

### Key Messages

1. Cyclists using BIXI bikes in Toronto are less likely to wear a helmet than cyclists riding their own bike; only 20.9% of all BIXI cyclists wear helmets compared to 51.7% of cyclists riding a personal bike.
2. More males than females are using the BIXI bikesharing program.
3. Females in Toronto were more likely to wear a helmet while cycling.

**Strengths:** This is the first study (to our knowledge) investigating helmet use in a bikesharing system. Additional strengths include the prospective study design, number of observations, randomly selected observation sites and stratified analyses by sex.

**Limitations:** The data was collected by one observer not blinded to the study hypothesis, observations were limited to presumed commuter hours in the downtown core of Toronto and we were unable to account for variables previously associated with helmet use, including income, education and age.

**ABSTRACT**

Objective: To investigate the use of helmets for cyclists choosing to use BIXI bikes in comparison to personal bike riders in the City of Toronto.

Design: Prospective cohort study design

Setting: Cyclists were observed in Toronto, Canada

Participants: Of the 6732 sample size, 306 cyclists on BIXI bikes and 6426 personal bike riders were observed.

Outcome measure: The outcome of interest was helmet use.

Results: Overall, 50.3% of cyclists wore helmets. The proportion of BIXI bike riders using helmets was significantly lower than the proportion of helmet users on personal bikes (20.9% versus 51.7%, respectively,  $p < 0.0001$ ).

Conclusions: Although the BIXI bike program has provided an alternate means for Torontonians to use a bicycle, cyclists using BIXI bikes are much less likely to wear a helmet. Since the prevalence of helmet use in cyclists in general is already low, helmet use should be especially promoted in BIXI bike riders in order to promote a safe and healthy environment for cyclists.

## INTRODUCTION

Urban cycling promotes healthy living and also minimizes environmental pollutants from vehicle emissions. Bikesharing initiatives, therefore, provide communities with a means to an active, healthy lifestyle via a sustainable means of transportation.<sup>1</sup>

Multiple variations of bikesharing programs have evolved across the world in the last 46 years, yet the core design amongst all programs remains the same – a finite number of bikes are placed throughout a community for citizens and visitors to ‘borrow’ at their leisure for shorter commutes within designated community zones.<sup>1</sup> The target population for these programs is within-city commuters who can benefit from the use of a temporary bicycle and avoid the worry of parking and locking a bike while at their destination.

The most prominent bikesharing program in North America is BIXI (named according to a combination of the elements of the program: ‘Bicycle’ and ‘taXI’). BIXI was also the first bikesharing company in Canada, initially in Montreal in 2009, and to the Toronto downtown core on May 3, 2011.<sup>2</sup> Eighty solar-paneled stations were placed throughout the city (Figure 1). Each station consists of a pay station and bike docks (Figure 2), distributed according to population density, frequent travel paths, and frequent bicyclist locations.<sup>2</sup>

[insert Figure 1: BIXI bike docking station locations, Toronto, 2011]

Note: Each station is denoted by the BIXI symbol “”. Source: Toronto Life<sup>3</sup>

[insert Figure 2: BIXI bike kiosk, with pay station and bike dock, Toronto, 2011]

Users of BIXI bikes can subscribe for a 1-year or 30-day access pass, or they can rent a bike by purchasing a 24-hour or 72-hour access pass. Requirements stated for usage of the BIXI bikes are that cyclists are 18 years of age or older and at least 1.24 meters tall; however, after a credit card has been registered or an account has been created, there is no actual method of



1  
2  
3 monitoring who rides the bicycle. Furthermore, there is no requirement for helmets to be worn  
4  
5 while on the bicycle, though BIXI encourages riders to wear a helmet while cycling.<sup>2</sup>  
6  
7

8 Cyclists over 18 years of age in Toronto, make the choice of whether or not to wear a  
9  
10 bicycle helmet because helmet legislation in Ontario only applies to children. It has been  
11  
12 estimated that bicycle helmets decrease the risk of head injury by 85%.<sup>4</sup> The 2001-2007  
13  
14 Canadian Community Health Surveys showed that 41% of youth and adults in Ontario regularly  
15  
16 use helmets while cycling.<sup>5</sup> Recent observational data revealed that only 50% of cyclists use  
17  
18 helmets in the Greater Toronto Area.<sup>6</sup>  
19  
20  
21

22 In the City of Toronto, 13,475 collisions were reported between cyclists and motor  
23  
24 vehicles between 1986 and 1996, resulting in 38 cyclist fatalities.<sup>7</sup> In the US as high as 500,000  
25  
26 emergency care visits are attributable to injuries sustained while riding a bicycle in the US,  
27  
28 resulting in 900 deaths annually. Head injuries and facial traumas represent one-third of these  
29  
30 emergencies, with three quarters of all bicycle-related deaths being attributable to head injuries.<sup>8</sup>  
31  
32  
33

34 With the advent of the BIXI bikesharing system throughout downtown Toronto and the  
35  
36 promotion of bicycle use for commuters, we were interested in examining the prevalence of  
37  
38 helmet use by BIXI bike users. To our knowledge, no study has examined the prevalence of  
39  
40 helmet use in bikesharing programs. The current study compared the use of helmets by cyclists  
41  
42 choosing to use BIXI bikes to personal bike riders in the City of Toronto. We hypothesized that  
43  
44 the proportion of helmet users using BIXI bikes would be significantly lower than those on  
45  
46 personal bikes.  
47  
48  
49

## 50 **METHODS**

51

52  
53 We used a prospective cohort study design to determine the proportion of helmet users in  
54  
55 downtown Toronto, Canada, for cyclists on personal bikes versus those on BIXI bikes. During an  
56  
57  
58  
59  
60



## Helmet Use in BIXI Cyclists in Toronto

6

1  
2  
3 observational period of one hour, a researcher observed how many cyclists on personal bikes and  
4  
5 how many cyclists on BIXI bikes wore or did not wear helmets. Observations were made  
6  
7 between July and September 2011, and took place during weekday 'commuter hours' (i.e.  
8  
9 between 0700–1000 or between 1500–1800). As the BIXI bike main use is to facilitate  
10  
11 transportation along short distances,<sup>2</sup> and most of the cyclist commuter traffic occurs during  
12  
13 these 'rush hour' time periods, this time period was chosen to maximize the number of both  
14  
15 BIXI bike and personal bike cyclists observed.  
16  
17  
18

19  
20 The main exposure variable was type of bicycle. For the purposes of this study, a  
21  
22 "bicycle" or "bike" was defined by the researchers to constitute a 2- wheeled, non-fuel-  
23  
24 consuming, foot pedal-based method of transportation, where the rider is seated and can hold  
25  
26 handlebars in front of them. The "BIXI bike" was identified by its characteristic BIXI shape  
27  
28 and/or colours (Figure 2), whether being removed or returned from the docking station or being  
29  
30 ridden past the point of observation. A "personal bicycle" was defined as any bicycle of a brand  
31  
32 other than BIXI. The outcome of interest was helmet use. A "helmet" was defined for the  
33  
34 purposes of this project to constitute a solid protection device worn on the head, with a chinstrap,  
35  
36 as a means of promoting personal safety to protect the head from impact in the event of a fall or  
37  
38 collision. Observed sex of the bicycle riders was also recorded as a covariate to understand  
39  
40 differences in helmet use by sex.  
41  
42  
43  
44  
45

46 Using the map of the BIXI bike docking (Figure 1), operational docking stations were  
47  
48 assigned numbers from 1-79 sequentially from North-East to South-West. Twenty-five  
49  
50 operational stations were randomly selected to designate observation points for the study. During  
51  
52 each observation period, a researcher sat in a location with the BIXI bicycle docking station in  
53  
54 clear view and noted all cyclists within view (approximately 20m radius from the BIXI bicycle  
55  
56  
57  
58  
59  
60

docking station), no matter which direction they were traveling. Cyclists of all ages were included in the study. No contact was made with the cyclists. Ethical approval was obtained from the research ethics review board at the Hospital for Sick Children in Toronto, Ontario.

A tally was collected for one of four categories: (1) BIXI bike riders with a helmet, (2) BIXI bike riders without a helmet, (3) personal bike riders with a helmet, or (4) personal bike riders without a helmet. Each category was subdivided by observed sex (male, female, unsure).

The required sample size for each of the two groups (BIXI bike cyclists and personal bike cyclists) was based on calculations using the formula for sample size calculations for two independent sample tests for proportions with an estimated effect size of 10%, and an estimated proportion of 50% of helmet use in personal bike users<sup>6</sup> for a two-sided test with a 5% level of significance, 80% power. The sample size calculation revealed that 407 subjects were needed per group.

Proportions of helmet users in BIXI bike cyclists and personal bike cyclists were calculated and compared between groups by Chi Square analysis using Epi Info (v.3.5.3) StatCalc. Each group was stratified by sex (male, female or “unsure”) and the proportion of helmet users within groups by sex was calculated.

## RESULTS

A total of 6732 cyclists were observed, including 306 BIXI bike cyclists and 6426 personal bike cyclists. When stratified by sex, a total of 4307 male cyclists and 2399 female cyclists were observed. Within groups, there were 234 male BIXI cyclists and 72 female BIXI cyclists, and 4073 male and 2327 female cyclists on personal bikes. For 24 helmet users and 2 non-helmet wearing cyclists on personal bikes, male or female designation could not be assigned; however, this represented a very small number of cyclists observed (0.4%) and thus

## Helmet Use in BIXI Cyclists in Toronto

8

these observations were not included in the analysis by sex. The remaining 6706 observations were included in the analysis.

Twenty-one percent of bike riders wore helmets while on BIXI bikes. This was significantly lower than the prevalence of helmet use by personal bike riders (51.7%; uncorrected  $X^2 = 110.48$ ,  $p < 0.0001$ ). Both male and female personal bike riders were statistically significantly more likely to wear helmets compared to male and female BIXI bike riders (males: 47.9% versus 20.1%, respectively; uncorrected  $X^2 = 68.84$ ,  $p < 0.0001$ , females: 57.8% versus 23.6%, respectively; uncorrected  $X^2 = 33.26$ ,  $p < 0.0001$ ). The results for across group comparisons of helmet use in BIXI bike users and personal bike users are summarized in Table 1.

Compared to male bike riders, female bike riders were more likely to wear helmets. On personal bikes, females wore helmets more often than males (57.8% versus 47.9%, respectively;  $X^2 = 58.10$ ,  $p < 0.0001$ ). On BIXI bikes, females also wore helmets more often than did males, though this difference was not statistically significant (23.6% versus 20.1%, respectively;  $X^2 = 0.41$ ,  $p < 0.5201$ ).

Overall, whether riding a BIXI bike or a personal bike, 3384 of 6732 cyclists observed (50.3%) wore helmets. The observed prevalence of BIXI bike usage in Toronto was 4.5%.

**Table 1: Observed helmet use by bicycle type, Toronto, 2011**

|                         | BIXI BIKE  |            |            | PERSONAL BIKE |            |            | X <sup>2</sup> | P-value |
|-------------------------|------------|------------|------------|---------------|------------|------------|----------------|---------|
|                         | Riders (N) | Helmet (N) | Helmet (%) | Riders (N)    | Helmet (N) | Helmet (%) |                |         |
| Total observed          | 306        | 64         | 20.9%      | 6426          | 3320       | 51.7%      | 110.48         | <0.0001 |
| Females                 | 72         | 17         | 23.6%      | 2327          | 1345       | 57.8%      | 33.26          | <0.0001 |
| Males                   | 234        | 47         | 20.1%      | 4073          | 1951       | 47.9%      | 68.84          | <0.0001 |
| Could not determine sex | 0          | 0          | -          | 26            | 24         | 92.3%      | (not analyzed) |         |

## DISCUSSION

The proportion of BIXI bike users (64, 20.9%) who were wearing a helmet, regardless of sex, was significantly lower than the proportion of personal bike users (3320, 51.7%) wearing a helmet. This means that, although BIXI was introduced with the purpose to promote the use of cycling for short commutes within the city, the BIXI bike program appears to decrease the already-low proportion of helmet users. Since the use of helmets while cycling has been recognized as a means of reducing significant head injuries,<sup>4,9</sup> severe facial trauma and even death,<sup>8,10</sup> the advent of a bikesharing program that decreases helmet use may increase the risk of severe injury and/or fatalities in the event of a collision while cycling. This is especially dangerous in an urban center such as Toronto, where cyclists often are found alongside motor vehicles on busy streets in peak commuting hours.

As has been replicated in previous studies,<sup>6,11</sup> a large sex difference was observed both with respect to total cyclists and helmet users. Although females were less likely to ride a bicycle overall, females who did use a bicycle were more likely to wear a helmet. This same pattern translated to BIXI bike users as well, with females less likely to use the BIXI bikes.

This study represents the first investigation (to our knowledge) of helmet use in a bikesharing system. A similar pattern may extend to bikesharing systems worldwide. As of 2008, there have been fatalities reported while using bikesharing systems internationally: 3 fatalities in

## Helmet Use in BIXI Cyclists in Toronto

10

1  
2  
3 Paris's Velib program, 3 collisions in New Zealand's NextBike, 1 collision in Hangzhou's  
4  
5 bikesharing system, and 1 in the North American BIXI system.<sup>1</sup> Given the nature of collision  
6  
7 data, these statistics may be underreported. Since helmet use has been shown to protect against  
8  
9 severe injuries and fatalities amongst collisions while cycling,<sup>8 10</sup> this suggests that bikesharing  
10  
11 systems, such as BIXI, should be accompanied by actions to promote helmet use. However, as  
12  
13 bikesharing programs cater to cyclists on-the-go within urban centers,<sup>1</sup> it is imperative that  
14  
15 solutions to promote helmet use be amenable to the commuter population and available at the  
16  
17 point of bike rental.  
18  
19  
20  
21

22  
23 One difficulty noted internationally is that helmet use may be legislated (or not) by a  
24  
25 municipal, state/province, or nationally country. In cities where helmet use is mandatory,  
26  
27 bikesharing systems have already begun to address the problem of low-helmet use, providing a  
28  
29 model through which other bikesharing systems may approach this dilemma in injury  
30  
31 prevention.<sup>12</sup> As helmets are mandatory for cyclists in Australia, a bikesharing system in  
32  
33 Melbourne piloted a project where helmets could be purchased or rented through vending  
34  
35 machines at the point of bike rental or at local convenience stores around the city.<sup>13</sup> Pending  
36  
37 helmet uptake data through this pilot, other bikesharing companies like BIXI could model this  
38  
39 project in order to promote helmet use within their consumers. BIXI bike could also work  
40  
41 towards providing machines near BIXI stations for helmet dispensing at the point of BIXI bike  
42  
43 rental.  
44  
45  
46  
47

48  
49 There are several limitations associated with the current study. This was the first study of  
50  
51 its kind to observe and count BIXI bike riders and personal bike riders. The fact that only one  
52  
53 observer who was not blinded to the hypothesis collected the data for the study could have  
54  
55 introduced a data collection bias. However, since the observer was measuring an objective  
56  
57  
58  
59  
60

1  
2  
3  
4  
5  
6  
7  
8  
9  
10  
11  
12  
13  
14  
15  
16  
17  
18  
19  
20  
21  
22  
23  
24  
25  
26  
27  
28  
29  
30  
31  
32  
33  
34  
35  
36  
37  
38  
39  
40  
41  
42  
43  
44  
45  
46  
47  
48  
49  
50  
51  
52  
53  
54  
55  
56  
57  
58  
59  
60

outcome through the tallying of bicyclists in the area at each station, it is unlikely that any significant personal or subjective bias was introduced. Furthermore, this study only observed cyclists within the presumed ‘commuter’ hours within the downtown core, such that the main population targeted for the study was cyclists commuting to work or to school. Previous studies have found that statistics of helmet use vary with income and education,<sup>11</sup> though in this study, all riders, regardless of attire or presumed reason for riding the bicycle, were counted towards the study population. Furthermore, although all observations were made during commuter hours, the locations of the randomly selected BIXI bike stations spanned many areas of downtown Toronto, including financial districts, local parks, intercity areas, and school campuses.<sup>2</sup> This layout in BIXI bike stations allows the program to cater to a wide array of Torontonians, and helped to increase the diversity of our study population to be representative of the natural Toronto population. Finally, this study did not classify cyclists by age; as a result, all analyses were conducted regardless of the age of the cyclists. Patterns of helmet use have been reported to vary with age, with youth and adolescents in Ontario most likely to wear a helmet.<sup>11</sup> Since the majority of the population observed consisted mainly of older youth and adults, it is unlikely that the presence of children under the helmet legislation would have significantly impacted the study’s results.

With an increasing focus on Toronto to be a healthy, environmentally-friendly city, cycling continues to be a promising sustainable means of transportation. Although the BIXI bike program has provided an alternate means for Torontonians to use a bicycle that is publically available for short-term, within-city routes,<sup>2</sup> its indirect negative effect on helmet use for cyclists poses a threat to cyclists’ safety. Efforts to promote cycling while protecting cyclists from severe injury should be made a priority in the promotion of a healthy and safe Toronto.

**AUTHOR CONTRIBUTIONS**

Marissa Bonyun: Study design, data collection, data analysis and interpretation, writing and editing of the manuscript, final approval of the manuscript.

Andi Camden: Study design, data analysis and interpretation, writing and editing of the manuscript, final approval of the manuscript.

Colin Macarthur: Consultation on design, data interpretation, writing and editing of the manuscript, final approval of the manuscript.

Andrew Howard: Conceptual framework and study design, data analysis and interpretation, writing and editing of the manuscript, final approval of the manuscript.

**DATA SHARING**

No additional data available.

**COMPETING INTERESTS**

None to declare.

**SOURCE OF FUNDING**

This research received no specific funding.

**REFERENCES**

1. Shaheen S, Guzman S, Zhang H. Bikesharing in Europe, the Americas, and Asia: Past, Present, and Future.: UC Davis: Institute of Transportation Studies., 2010.
2. BIXI. BIXI Toronto Online, 2011.
3. Vaccaro M. Check out BIXI Toronto's 80 downtown bike locations on one interactive map: Toronto Life Online, 2011.
4. Thompson RS, Rivara FP, Thompson DC. A case-control study of the effectiveness of bicycle safety helmets. *New England Journal of Medicine* 1989;320(21):1361-67.
5. Dennis J, Potter B, Ramsay T, et al. The effects of provincial bicycle helmet legislation on helmet use and bicycle ridership in Canada. *Injury Prevention* 2010;16(4):219-24.
6. Page JL, Macpherson AK, Middaugh-Bonney T, et al. Prevalence of helmet use by users of bicycles, push scooters, inline skates and skateboards in Toronto and the surrounding area in the absence of comprehensive legislation: an observational study. *Injury Prevention* 2011;[Epub ahead of print: August 26, 2011].
7. Lucas WJ. A report on cycling fatalities in Toronto 1986-1998 – recommendations for reducing cycling injuries and death. *Chief Coroner, Province of Ontario*, 1998.
8. Thompson D, Rivara F, Thompson R. Helmets for preventing head and facial injuries in bicyclists (review). *Cochrane Database of Systematic Reviews* 2009.
9. Macpherson A, Spinks A. Bicycle helmet legislation for the uptake of helmet use and prevention of head injuries (review). *Cochrane Database of Systematic Reviews* 2008(3).
10. Attewell RG, Glase K, McFadden M. Bicycle helmet efficacy: a meta-analysis. *Accid Anal Prev* 2001;33(3):345-52.
11. Irvine A, Rowe BH, Sahai V. Bicycle helmet-wearing variation and associated factors in Ontario teenagers and adults. *Canadian Journal of Public Health* 2002;93(5):368-73.



## Helmet Use in BIXI Cyclists in Toronto

14

- 1
  - 2
  - 3
  - 4
  - 5
  - 6
  - 7
  - 8
  - 9
  - 10
  - 11
  - 12
  - 13
  - 14
  - 15
  - 16
  - 17
  - 18
  - 19
  - 20
  - 21
  - 22
  - 23
  - 24
  - 25
  - 26
  - 27
  - 28
  - 29
  - 30
  - 31
  - 32
  - 33
  - 34
  - 35
  - 36
  - 37
  - 38
  - 39
  - 40
  - 41
  - 42
  - 43
  - 44
  - 45
  - 46
  - 47
  - 48
  - 49
  - 50
  - 51
  - 52
  - 53
  - 54
  - 55
  - 56
  - 57
  - 58
  - 59
  - 60
12. Midgley P. Bicycle-sharing schemes: enhancing sustainable mobility in urban areas. In:  
Development CoS, editor. New York: United Nations - Department of Economic and  
Social Affairs.
13. VicRoads. Melbourne bike share (the blue bikes). 2006.

For peer review only

1 Editor, BMJ Open  
2

3 Dear Sir/Madam,  
4

5 Thank you for your interest in our observational study comparing bicycle helmet  
6 use between users of a bike sharing system and users of personal bicycles.  
7

8  
9 We have considered each comment made by the reviewers and have modified the  
10 manuscript accordingly. An updated manuscript with track changes in word is  
11 submitted.  
12

13  
14 Details of changes made in response to each reviewers comment are found below.  
15

16 We look forward to your consideration of this revision.  
17

18 Sincerely,  
19

20 Andrew Howard  
21  
22  
23  
24  
25  
26  
27  
28  
29  
30  
31  
32  
33  
34  
35  
36  
37  
38  
39  
40  
41  
42  
43  
44  
45  
46  
47  
48  
49  
50  
51  
52  
53  
54  
55  
56  
57  
58  
59  
60

1 Response to Reviewers is in *italics* below the corresponding items.  
2

3 Reviewer: Aymery Constant, Phd, Mpsych  
4 Senior Lecturer  
5 EHESP School of Public Health  
6 France  
7  
8

9 I have no competing interest to declare  
10

11 Strengths: This paper addresses an important issue, i.e. Helmet use in a bikesharing  
12 system. Data collection relies upon observed rather than self-reported helmet use.  
13 Many cyclists were observed (N=6732). Cyclists were observed in their  
14 environment at different locations, in a major city in North America.  
15  
16

17 *Thank you.*  
18

19 Some points however need to be discussed:  
20

21  
22 My main concern is related to independence of statistical units (observations). It is  
23 not stated whether or not observations are independent. In others words, was it  
24 possible for the same cyclist to be observed more than once? Did authors take  
25 measures to ensure that each observation corresponds to one individual? It seems  
26 that observed cyclists were identified by no means. Repeated observations are thus  
27 possible. This would constitute a bias. Maybe observations sites were distant  
28 enough to ensure a relative independence between observations? This point needs  
29 to be clarified, or at least mentioned.  
30  
31

32  
33 *Observations were made at physically separate sites on different days by the same*  
34 *observer. A small fraction of the total number of cyclists in Toronto was sampled, but*  
35 *there was no systematic way to identify individuals. We mention this in the*  
36 *limitations. "Finally, individual cyclists were not identified so may have been observed*  
37 *more than once."*  
38  
39

40 My others concerns are:  
41

- 42 1) Page 3 line 10, Design: it seems to me that the term "prospective cohort"  
43 is not relevant, since participants were not recruited in the study before  
44 being observed. "Ecological" or "observational" study might be better  
45 terms.  
46

47 *Agree. We have changed the term to 'cross sectional study per Don Voaklander's*  
48 *review below also.*  
49

- 50 2) Authors hypothesize that the proportion of helmet users using BIXI bikes  
51 would be significantly lower than those on personal bikes (page 2 line 13). Why?  
52 This hypothesis needs to be supported by data or previous observations. What are  
53 the (supposed) differences between cyclists using personal bikes and those using  
54 BIXI bikes? In my opinion, exposure, cycling habits and familiarity with road hazard  
55 might discriminate these two groups, as well as others variables potentially  
56 influencing helmet use. This point need to be further developed in the introduction.  
57  
58  
59  
60

1 *Agree. We have substantiated our hypothesis and added a reference to Constant.*

2  
3 3) Authors state that “this is the first study investigating helmet use in a  
4 bikesharing system (page 2 line 34; page 5 line 39 and so on). This is no longer true  
5 since Februray 15th 2012  
6 (<http://www.plosone.org/article/info:doi/10.1371/journal.pone.0031651>). But  
7 this is the first study, to my knowledge, investigating behavioral differences  
8 between cyclists using personal bikes and those using bike sharing system.  
9  
10

11 *Agree. We have cited the Constant paper and thank the reviewer for bringing it to our*  
12 *attention.*

13  
14  
15 4) Authors present the 79 BIXI Bike docking stations locations in Figure 1.  
16 Observation points (25 out of 79) should be also indicated, preferably on the same  
17 map, or in a separate file.  
18  
19

20 *We did not map the observation locations. I have omitted the figures for the second*  
21 *revision.*

22  
23  
24 5) Selection of observation periods: It is started that “a researcher observed  
25 cyclists during one hour during commuters’ hours” (7-10; 15-18) (pages 5-6) .  
26 Authors should indicate why observation period lasted only one hour (and not two,  
27 or three) during each time-slot (fatigue, lack of vigilance after one hour of  
28 observation?). Also, authors seem to think that the different time-slots are similar  
29 as far as traffic or observed cyclists’ profiles are concerned. May be its not true. For  
30 instance, cyclists observed at 9 am might be going to work, while those observed at  
31 15pm might just go for a stroll. In fact, authors should present the number of  
32 observation by time-slots, and discuss whether or not they are equally distributed  
33 (they should be)  
34  
35  
36

37 *Response: we calculated a sample size based on observing sufficient bikes to determine*  
38 *whether a difference in helmet wearing rate was present. While we understand that*  
39 *cycle use differs at different hours of the day, we did not have the resources to study*  
40 *this aspect in detail.*  
41  
42

43 6) The Table 1 is rather confusing. Results are difficult to read. They should  
44 follow a logical sequence. First, give the proportion of helmet users in the whole  
45 study sample (and indicate whether or not this estimate is similar to helmet wearing  
46 rate in Toronto, if available. Computing 95% confidence intervals might be useful).  
47 Then, investigate helmet use according to gender, and BIXI use, separately. And  
48 then, investigate interaction effects (Helmet use = Gender X BIXI use). The  
49 “undetermined sex” cyclists should be excluded from the analyses.  
50  
51  
52

53 *Response: The undetermined sex cyclists are excluded from the analyses. They are*  
54 *small in number and are listed in the table. With respect to the reviewer, we prefer to*  
55 *present a number and proportion of helmet users comparing BIXI to personal bikes as*  
56 *that conforms to the specific research question.*  
57  
58  
59  
60

1 7) Authors state in a key message that “more males than females are using the  
2 BIXI program”. This might reflect the fact that more male than female cyclists were  
3 observed. The main result should be “more males than females ride a bicycle in  
4 Toronto “ and consequently, “more males than females are using the BIXI program”.  
5 The latter statement can be confirmed with a simple crosstab (Gender X BIXI use)  
6 and a chi square test. However, this is not the aim of the study. It is rather an  
7 ancillary result.  
8

9  
10 *Agree. We have changed the key message to more males than females ride bicycles in*  
11 *Toronto.*  
12

13  
14 8) Page 8 line 32: Authors state that “in bixi bikes, females wore helmets more  
15 often than did males, though this difference was not significant”. This statement is  
16 not true. In the absence of a significant effect, there is no difference in helmet  
17 wearing rate between males and females using bixi bikes. Please correct.  
18

19  
20 *Agree. We have changed the statement to “On BIXI bikes, gender differences in helmet*  
21 *use were not statistically significant (23.6% of females versus 20.1% of males,*  
22 *respectively;  $X^2 = 0.41$ ,  $p < 0.5201$ ).”*  
23

24  
25 9) Age is not assessed in the study (as stated in the “limitations”). An estimated  
26 age (e.g. youth, adult, senior) would have been a very interesting variable, though. In  
27 Toronto, helmet law applies to children only. The law was passed on October 1,  
28 1995. Accordingly, young adults (aged 18-30 years, for instance) might be more  
29 likely to wear helmet than older people. Since they have been required to do it for  
30 years. Habit is a significant predictor of actual behavior. This should be mentioned  
31 in the discussion section. Moreover, authors state “the majority of population  
32 observed consisted mainly of older youth and adults” (page 11 line 34). In the  
33 absence of an estimated age in collected data, such statement is not relevant.  
34  
35

36  
37 *Agree. We have removed the statement about our impression of the ages. We have*  
38 *replaced it with a statement that BIXI bikes are available only to adults.*  
39

40  
41 10) Overall, most legislative and non-legislative interventions to promote helmet  
42 use in Canada were oriented towards children only. This study suggests that  
43 prevention initiatives are required towards adult cyclists also. Especially those  
44 using bikesharing programs, who might be less familiar with road hazard than  
45 others cyclists.  
46

47  
48 *Agree. We hope to publish the observations to contribute to this necessary dialogue.*  
49

50 Reviewer: Emmanuel LAGARDE  
51 INSERM U897 Bordeaux, France  
52

53  
54 General comment  
55

56 This is a very-well conducted study on the prevalence of helmet use among BIXI  
57 bicycle users showing a 21% rate of use, lower than the 52% rate for personal bike  
58 riders. These estimates are based on the observations of a total of 6706. While these  
59  
60

1 results are of interest and are worth to be mentioned in a journal like BMJ, my  
2 opinion is that it does not deserve a short report and should be published as a  
3 research letter.  
4

5 *Thank You.*  
6  
7

8 Specific comments  
9

10 Introduction: cautions should be exercise when citing a 85% protection of helmet  
11 from Thompson 1989 study. Since that time, this has been criticized and more  
12 recent studies seemed to provide lower protection rate estimates. Please see Elvik'  
13 2011 paper (Acc Anal Prev 2011;43:1245-1251).  
14  
15

16 *Agree. We have cited Elvik also and modified the statement in the introduction.*  
17  
18

19 Addition information would be of interest to understand why some users are using  
20 BIXI with and without a helmet. My guess would be that those with a helmet are  
21 those who are also personnel bike riders and who, for some reason, were using BIXI  
22 this time. Incidentally, I must say that I am very much impressed by these overall  
23 rates of use. In Bordeaux, we just conducted a similar study (but with automatic  
24 video observation) and found a rate of 0.8% (N=1455) for our BIXI-like system  
25 users and 3.2% (N=3162) for other bike riders. The main reason for non-users is the  
26 helmet inconvenience.  
27  
28

29 *Agree. We cannot provide additional information on users decisions from this type of*  
30 *study, though.*  
31  
32

33 Finally, given the very simple study design, I see no particular methodological  
34 problem. In particular, I am not concerned with the non-blind nature of the observer  
35 which unlikely to have biased the results.  
36  
37

38 *Agree*  
39

40 Reviewer: Don Voaklander  
41 Professor, University of Alberta  
42 Canada  
43  
44

45 This is not a prospective cohort study. It is a cross-sectional study.  
46  
47

48 *Agree. We have changed the abstract and methods.*  
49  
50  
51  
52  
53  
54  
55  
56  
57  
58  
59  
60
